# Supplementary material for: Tuning the sensitivity of fluorophore–nitroxide radicals
Source: Royal Society of Chemistry journal article supplement (doi:10.1039/c2jm31390a), 2012-01-01
Supplement: c2jm31390a.pdf [file c2jm31390a.pdf]

Cite this: DOI: 10.1039/c0xx00000x

www.rsc.org/xxxxxx

ARTICLE TYPE

## Supplementary Data:

Tuning the Sensitivity of Fluorophore-Nitroxide Radicals

Yulia B. Borozdina,<sup>a</sup> Valentin Kamm,<sup>b</sup> Frédéric Laquai<sup>b</sup> and Martin Baumgarten\*<sup>a</sup>

<sup>a</sup> Laboratory of Synthetic Chemistry, Max Planck Institute for Polymer Research, Ackermannweg 10, 55128, Mainz, Germany.

E-mail: baumgart@mpip-mainz.mpg.de

<sup>b</sup> Research Group for Organic Optoelectronics, Max Planck Institute for Polymer Research, Ackermannweg 10, 55128, Mainz, Germany.

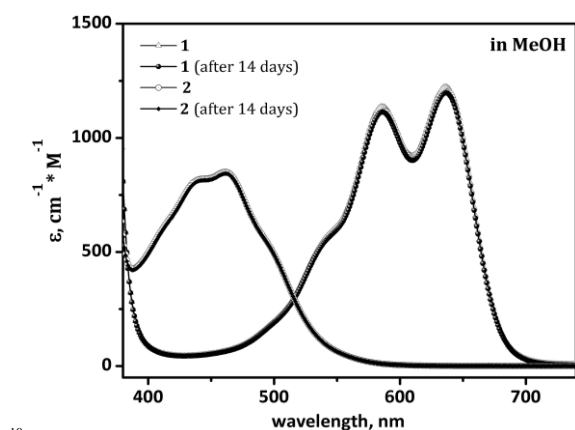

Figure S1 Stability of the probes 1, 2 in deaerated methanol.

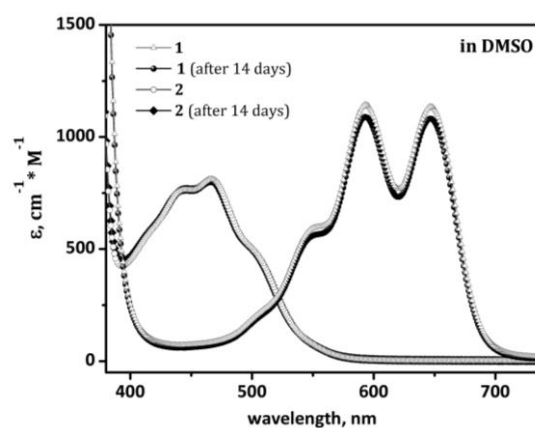

Figure S3 Stability of the probes 1, 2 in deaerated DMSO.

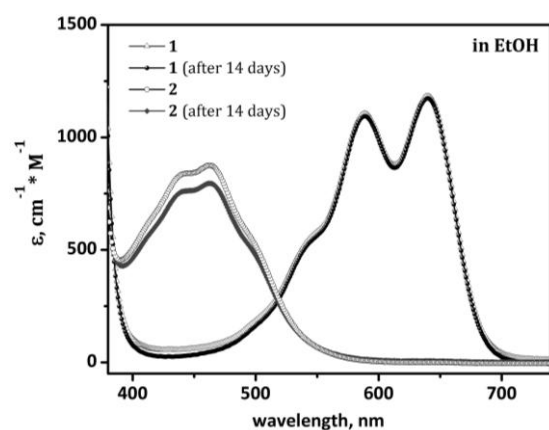

Figure S2 Stability of the probes 1, 2 in deaerated ethanol.

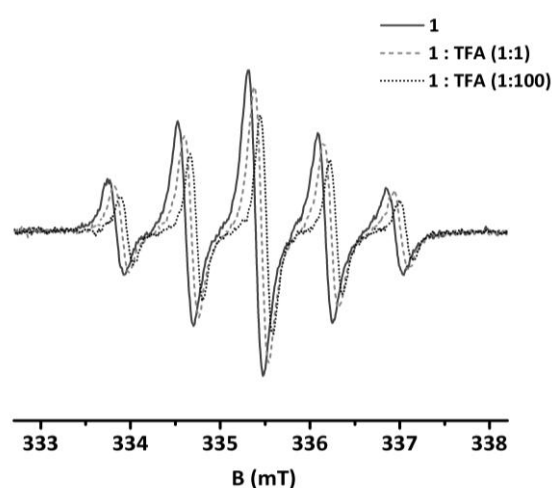

Figure S4 A tiny decrease of the EPR signals intensities of the freshly prepared samples in deaerated MeOH upon acid addition.
